## Correction for: Integrated analysis of microRNA and mRNA expression profiling identifies BAIAP3 as a novel target of dysregulated hsa-miR-1972 in age-related white matter lesions

Wen-Qing Huang<sup>1,2,\*</sup>, Qing Lin<sup>3,4,5,6,\*</sup>, Shuai Chen<sup>7,8,\*</sup>, Lixiang Sun<sup>2,\*</sup>, Qingjie Chen<sup>9</sup>, Kehui Yi<sup>3,10</sup>, Zhi Li<sup>2</sup>, Qilin Ma<sup>3,4,5,6,&</sup>, Chi-Meng Tzeng<sup>2,11</sup>

<sup>1</sup>Shanghai Institute of Precision Medicine (SHIPM), Ninth People's Hospital, Shanghai Jiao Tong University School of Medicine, Shanghai, China

<sup>2</sup>Translational Medicine Research Center (TMRC), School of Pharmaceutical Sciences, Xiamen University, Xiamen, Fujian, China

<sup>3</sup>Department of Neurology, The First Affiliated Hospital of Xiamen University, Xiamen, Fujian, China

<sup>4</sup>Xiamen Key Laboratory of Brain Center, The First Affiliated Hospital of Xiamen University, Xiamen, Fujian, China

<sup>5</sup>School of Medicine, Xiamen University, Xiamen, Fujian, China

<sup>6</sup>The First Clinical College of Fujian Medical University, Fuzhou, Fujian, China

<sup>7</sup>Department of Otolaryngology-Head and Neck Surgery, Xiamen Key Laboratory of Otolaryngology-Head and Neck Surgery, The First Affiliated Hospital of Xiamen University, Xiamen, Fujian, China

<sup>8</sup>Chen Zhi-nan Academician Workstation, Institute of Basic and Translational Medicine, Xi'an Medical University, Xi'an, Shanxi, China

<sup>9</sup>Department of Nuclear Medicine, The First Affiliated Hospital of Nanchang University, Nanchang, Jiangxi, China

<sup>10</sup>Department of Neurology, Zhongshan Xiamen Hospital, Fudan University, Xiamen, Fujian, China

<sup>11</sup>College of Pharmaceutical Sciences, Nanjing Tech University, Nanjing, Jiangsu, China

\*Equal contribution

**Correspondence to:** Chi-Meng Tzeng, Qilin Ma, Qing Lin; **email:** [cmtzeng@xmu.edu.cn](mailto:cmtzeng@xmu.edu.cn), [qilinma@yeah.net](mailto:qilinma@yeah.net), [lingqing2005602@xmu.edu.cn](mailto:lingqing2005602@xmu.edu.cn)

**Original article:** *Aging (Albany NY)* 2021; 13: pp 4674-4695

PMID: [33561007](https://pubmed.ncbi.nlm.nih.gov/33561007/)

PMCID: [PMC7906144](https://pubmed.ncbi.nlm.nih.gov/PMC7906144/)

doi: [10.18632/aging.202562](https://doi.org/10.18632/aging.202562)

**This article has been corrected:** The authors requested to remove the first and last affiliations. This correction does not change the content of the publication. The correct list of authors and affiliations is provided below:

Wen-Qing Huang<sup>1,\*</sup>, Qing Lin<sup>2,3,4,5,\*</sup>, Shuai Chen<sup>6,7,\*</sup>, Lixiang Sun<sup>1,\*</sup>, Qingjie Chen<sup>8</sup>, Kehui Yi<sup>2,9</sup>, Zhi Li<sup>1</sup>, Qilin Ma<sup>2,3,4,5,&</sup>, Chi-Meng Tzeng<sup>1</sup>

<sup>1</sup>Translational Medicine Research Center (TMRC), School of Pharmaceutical Sciences, Xiamen University, Xiamen, Fujian, China

<sup>2</sup>Department of Neurology, The First Affiliated Hospital of Xiamen University, Xiamen, Fujian, China

<sup>3</sup>Xiamen Key Laboratory of Brain Center, The First Affiliated Hospital of Xiamen University, Xiamen, Fujian, China

<sup>4</sup>School of Medicine, Xiamen University, Xiamen, Fujian, China

<sup>5</sup>The First Clinical College of Fujian Medical University, Fuzhou, Fujian, China

<sup>6</sup>Department of Otolaryngology-Head and Neck Surgery, Xiamen Key Laboratory of Otolaryngology-Head and Neck Surgery, The First Affiliated Hospital of Xiamen University, Xiamen, Fujian, China

<sup>7</sup>Chen Zhi-nan Academician Workstation, Institute of Basic and Translational Medicine, Xi'an Medical University, Xi'an, Shanxi, China

<sup>8</sup>Department of Nuclear Medicine, The First Affiliated Hospital of Nanchang University, Nanchang, Jiangxi, China

<sup>9</sup>Department of Neurology, Zhongshan Xiamen Hospital, Fudan University, Xiamen, Fujian, China  
\*Equal contribution
